# Supplementary material for: The Effect of Functionalized Multiwall Carbon Nanotubes with Fe and Mn Oxides on Lactuca sativa L.
Source: MDPI journal article supplement (doi:10.3390/plants12101959), 2023-05-11
Supplement: s1 [file s1]

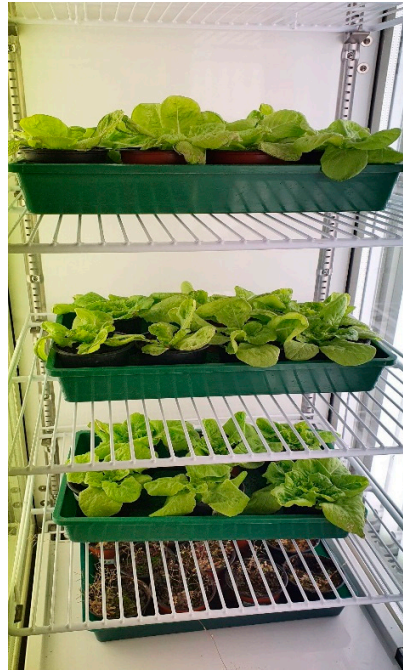

**Figure S1.** Plant development at 21 days.

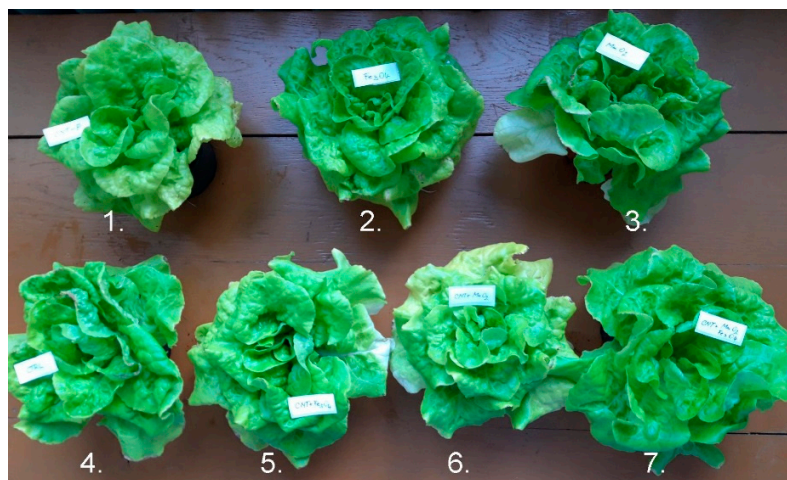

**Figure S2.** One individual plant from each treatment: 1- CNT-COOH; 2-  $\text{Fe}_3\text{O}_4$ ; 3-  $\text{MnO}_2$ ; 4- Control; 5- CNT- $\text{Fe}_3\text{O}_4$ ; 6- CNT- $\text{MnO}_2$ ; 7- CNT- $\text{Fe}_3\text{O}_4$ - $\text{MnO}_2$ .

**Table S1.** Elemental composition of lettuce leaves described in the literature.

|                       | Na*       | Mg*       | Al**       | Cl*      | K*        | Ca*       | Mn**        | Sc***    | Fe**                   | Co***                 | References |
|-----------------------|-----------|-----------|------------|----------|-----------|-----------|-------------|----------|------------------------|-----------------------|------------|
| I <sup>a</sup> ; m.a. | 0.14±0.03 |           |            |          | 6.3±1.4   | 0.51±0.08 |             |          | 16.1±3.0               | 7.9±1.7               | [44]       |
| O <sup>a</sup> ; m.a. | 0.34±0.07 |           |            |          | 8.3±1.9   | 1.17±0.18 |             |          | 44±13                  | 19.3±5.6              |            |
| I <sup>b</sup> ; m.a. | 0.17±0.14 |           |            |          | 7.2±0.8   | 0.54±0.05 |             |          | 16.9±4.6               | 8.4±1.7               |            |
| O <sup>b</sup> ; m.a. | 0.31±0.11 |           |            |          | 10.7±1.7  | 1.29±0.06 |             |          | 53.2±3.6               | 30±10                 |            |
|                       |           |           |            |          |           |           |             |          | 530.4 <sup>1</sup>     | 7200 <sup>1</sup>     | [40]       |
| m.a.                  | 2.9±0.7   | 3.6±0.7   | 3524±318   | 17.9±0.4 |           | 13.3±0.6  | 68.81±0.22  |          | 1506±54.3 <sup>2</sup> | 1010±160 <sup>2</sup> |            |
| C ; c.s.              | 4.2       | 5.2       |            | 22.8     | 96.1      | 30.3      | 0.042       |          | 0.42                   | 302                   | [35]       |
| c.s.                  | 6-10.3    | 3.6-6.8   |            | 8.5-15.1 | 52.7-74.9 | 14.9-22.9 | 0.013-0.038 |          | 0.19-0.97              | 76-1026               |            |
| O; m.a. <sup>3</sup>  | 1.93±0.01 | 3.2±0.014 |            |          | 84.8±1.7  | 12.9±0.15 | 157.6±3.1   |          | 343±24                 | 0.13±0.05             | [37]       |
| O; m.a.; <sup>2</sup> | 2.4±0.8   |           |            |          | 82±13     | 9.92±0.45 |             |          | 409±28                 | 0.23±0.08             |            |
| I; m.a.; <sup>3</sup> | 0.74±0.04 | 2.04±0.01 |            |          | 54.3±0.1  | 5.0±0.28  | 38.2±1.2    |          | 102±10                 | 0.067±0.02            |            |
| I; m.a.; <sup>2</sup> | 1.3±1.1   |           |            |          | 55.1±6    | 4.18±0.04 |             |          | 130±35                 |                       |            |
| c.s.                  |           | 3.9-6.1   |            |          | 35.7-56.0 | 16.7-26.3 | 43.9-89.2   |          | 160-514                |                       | [36]       |
| C                     |           | 5.1       |            |          | 66.0      | 19.0      | 136         |          | 316                    |                       |            |
| c.s.                  | 1.3-9.1   | 3.8-4.5   | 5.6-103    |          | 12.8-27.3 | 3.8-14.6  | 8.0-41      |          | 41-159                 | 30-190                | [39]       |
|                       |           |           | 73         |          |           |           |             | 7-12     |                        |                       | [34]       |
| p.w.c.                |           |           | 1634- 6450 |          |           |           | 113-170     | 70-37100 | 349-1087               | 0.2-72                | [46]       |
| u.c.                  | 1.2-3.7   | 2.3-4.2   |            | 54-125   | 36-93     | 4.3-7.6   | 10-23       |          | 91-393                 | 1000-21000            | [38]       |

Table S1. Continuation.

|                       | Zn**              | As***     | Se***   | Br**      | Rb**      | Sr**      | Mo**      | Sb***     | Cs***    | Ba**   | Th***     | References |
|-----------------------|-------------------|-----------|---------|-----------|-----------|-----------|-----------|-----------|----------|--------|-----------|------------|
| I <sup>a</sup> ; m.a. | 4.99±0.58         | 13±6.7    |         | 1.27±0.23 | 1.19±0.1  | 2.45±0.39 |           | <8        |          |        |           |            |
| O <sup>a</sup> ; m.a. | 3.55±0.60         | 43±16     |         | 2.74±0.45 | 1.56±0.11 | 5.5±0.54  |           | 3.94±0.86 |          |        |           | [44]       |
| I <sup>b</sup> ; m.a. | 7.24±0.5          | 6.5±2.1   |         | 3.41±0.45 | 1.20±0.12 | 2.00±0.23 |           | 4.5±1.5   |          |        |           |            |
| O <sup>b</sup> ; m.a. | 7.14±0.33         | 24.3±2.1  |         | 8.3±1.8   | 1.72±0.18 | 6.85±0.59 |           | 11.5±1.8  |          |        |           |            |
| m.a.                  | 67.8 <sup>1</sup> |           |         |           |           |           |           |           |          |        |           | [40]       |
| C ; c.s.              | 0.84              |           |         | 87.5      | 52.3      |           |           | 85        | 50       |        | 25        | [35]       |
|                       | 0.35-1.23         |           |         | 62-80     | 59.3-81   |           |           | 30.3-79   | 170-2360 |        | 24-143    |            |
| O; m.a. <sup>3</sup>  | 45.7              |           |         |           | 11.6±0.94 |           |           | 46.8±7.1  |          |        |           |            |
| O; m.a.; <sup>2</sup> | 54.9              |           |         |           | 13.2±1.4  |           |           | 88±14     |          |        |           | [37]       |
| I; m.a.; <sup>3</sup> | 56.2              |           |         |           | 9.22±0.34 |           |           | 34.9±7.3  |          |        |           |            |
| I; m.a.; <sup>2</sup> | 55.7              |           |         |           | 9.23±0.92 |           |           | 35±12     |          |        |           |            |
| c.s.                  | c.s.              | 70.5-439  |         |           |           |           |           |           |          |        |           |            |
| C                     | C                 | 83.0      |         |           |           |           |           |           |          |        |           | [36]       |
| c.s.                  | c.s.              | 28.7-37.5 | 310-490 |           |           |           | 22.7-34.9 | 0.27-0.36 |          |        | 5.2-12.0  | [39]       |
|                       |                   | 55-530    | 20-250  | 57        | 20-22     | 14        | 74        | 0.074     |          |        | 9.4       | [34]       |
| p.w.c.                | 25-42             |           |         |           | 13-57     |           |           | 100-4200  |          | 10-135 | 150-20000 | [46]       |
| u.c.                  | 56-52             |           |         | 17-32     | 68-142    |           |           |           | 160-450  | 7-27   |           | [38]       |

\*g/kg; \*\*mg/kg; \*\*\* µg/kg;

C- control lettuce leaves; O-outer lettuce leaves; I-inner lettuce leaves; <sup>a</sup>-Evora; <sup>b</sup>-Coimbra; <sup>1</sup>-AAS, <sup>2</sup>-INAA; <sup>3</sup>-k0-NAA

m.a. - market available; c.s. – contaminated soil; p.w.c.- potential polluted water for irrigation; u.c –urban cultivation
